# Supplementary material
Source: publisher figshare collection journal article supplement (https://acs.figshare.com/ndownloader/files/4400782)
Supplement: Supplementary file 1 [file 4400782]

**Structural Characterization and Antimicrobial Activity of the Zn(II) Complex with P-113 (Demegen), a Derivative of Histatin 5**

*Elena Porciatti<sup>a</sup>, Marina Milenković<sup>b</sup>, Elena Gaggelli<sup>a</sup>, Gianni Valensin<sup>a</sup>, Henryk Kozłowski<sup>c</sup>,  
Wojciech Kamysz<sup>d</sup> and Daniela Valensin<sup>a\*</sup>*

<sup>a</sup>Department of Chemistry, University of Siena, via Aldo Moro, 53-100 Siena, Italy,

<sup>b</sup>Faculty of Pharmacy, University of Belgrade, Vojvode Stepe 450, Belgrade, Serbia

<sup>c</sup>Faculty of Chemistry, University of Wrocław F. Joliot-Curie 14, 50-383 Wrocław, Poland,

<sup>d</sup>Department of Inorganic Chemistry, Faculty of Pharmacy, Medical University of Gdańsk, Al. Gen.  
Haller 107, 80-416 Gdańsk, Poland

\*Daniela Valensin. Email: [valensindan@unisi.it](mailto:valensindan@unisi.it)

Table 1S. <sup>1</sup>H NMR chemical shift of P113 and Ac-P113.

Figure 1S. <sup>1</sup>H 1D spectra of P113 1.0 mM, pH 7.0, in H<sub>2</sub>O/D<sub>2</sub>O 9:1 mixture at (a) T= 278 and (b) T=298 K.

Figure 2S. CD spectra of P113 in absence (solid line) and in presence of 3.0 (dot-dash line) or 6.0 (dash line) Zn(II) eqs. All the samples were 0.06 mM, in water, pH 7.0, T=298.

Figure 3S. Selected regions of <sup>1</sup>H 1D NMR spectra at T=318 K in absence and in presence of Zn(II) of (A) AcP113, (B) P113. The peptide solutions were 2.0 mM, in DMSO-d<sub>6</sub>.

Figure 4S. Selected regions of <sup>1</sup>H-<sup>1</sup>H TOCSY spectra in absence (black) and in presence (green) of 6.0 Zn(II) eqs. (A) AcP113, (B) P113. The peptide solutions were 2.0 mM, in DMSO-d<sub>6</sub>.

Figure 5S. Selected regions of  $^1\text{H}$  1D NMR spectra at  $T=278\text{ K}$  of P113 in presence of different amount of  $\text{Zn(II)}$ . The peptide solutions were  $1.0\text{ mM}$ , in  $\text{H}_2\text{O}/\text{D}_2\text{O}$  (9:1). \* and # labels correspond to the signals of the apo and  $\text{Zn(II)}$  bound forms respectively.

Figure 6S. Comparison of the (A) P113- $\text{Zn(II)}$  and (B) P113- $\text{Cu(II)}$  structures. In both cases the first 11 structures, fitted on the backbone of residues 1-5, are shown. Figure was created with MOLMOL 2K.1.0.

**Table 1S.**  $^1\text{H}$  NMR resonance assignments of P113 and AcP113 in DMSO (T=318 K) and in water (T=278 K).

| Residue | Proton          | AcP113(DMSO) | P113 (DMSO) | P113(H <sub>2</sub> O) |
|---------|-----------------|--------------|-------------|------------------------|
| Ac      | CH <sub>3</sub> | 1.89         | -           | -                      |
|         | HN              | 8.04         | -           | -                      |
| Ala1    | H $\alpha$      | 4.25         | 3.80        | 4.00                   |
|         | H $\beta$       | 1.23         | 1.34        | 1.47                   |
|         | HN              | 7.91         | 8.39        | -                      |
| Lys2    | H $\alpha$      | 4.26         | 4.33        | 4.29                   |
|         | H $\beta$       | 1.74         | 1.72        | 1.76                   |
|         | H $\gamma$      | 1.36         | 1.34        | 1.41                   |
|         | H $\delta$      | 1.56         | -           | -                      |
|         | H $\epsilon$    | 2.79         | -           | 2.98                   |
|         | HN              | 7.89         | 8.06        | 8.62                   |
| Arg3    | H $\alpha$      | 4.28         | 4.28        | 4.28                   |
|         | H $\beta$       | 1.71         | 1.52        | 1.72                   |
|         | H $\gamma$      | 1.52         | 1.52        | 1.53                   |
|         | H $\delta$      | 3.12         | 3.13        | 3.09                   |
|         | NH $\epsilon$   | -            | 7.67        | -                      |
|         | HN              | 7.91         | 7.94        | 8.55                   |
| His4    | H $\alpha$      | 4.46         | 4.48        | 4.53                   |
|         | H $\beta$ 1     | 2.92         | 2.91        | 3.03                   |
|         | H $\beta$ 2     | 2.92         | 2.91        | 3.03                   |
|         | H $\delta$      | 6.84         | 6.84        | 6.94                   |
|         | H $\epsilon$    | 7.52         | 7.52        | 7.72                   |
|         | HN              | 8.07         | 8.12        | 8.31                   |
| His5    | H $\alpha$      | 4.43         | 4.45        | 4.56                   |
|         | H $\beta$ 1     | 3.03         | 3.04        | 3.03                   |
|         | H $\beta$ 2     | 2.90         | 2.89        | 3.03                   |
|         | H $\delta$      | 6.83         | 6.83        | 6.96                   |
|         | H $\epsilon$    | 7.57         | 7.58        | 7.62                   |
| Gly6    | HN              | 8.73         | 8.75        | 8.56                   |
|         | H $\alpha$      | 3.73         | 3.74        | 3.90                   |
|         | HN              | 8.14         | 8.16        | 8.22                   |
|         | H $\alpha$      | 4.46         | 4.49        | 4.52                   |
| Tyr7    | H $\beta$ 1     | 2.98         | 2.97        | 3.00                   |
|         | H $\beta$ 2     | 2.75         | 2.74        | 3.00                   |
|         | H $\delta$      | 6.67         | 6.68        | 7.10                   |
|         | H $\epsilon$    | 7.04         | 7.03        | 6.81                   |
|         | HN              | 8.0          | 8.04        | 8.34                   |
|         | H $\alpha$      | 4.26         | 4.28        | 4.24                   |
| Lys8    | H $\beta$       | 1.74         | 1.70        | 1.67                   |
|         | H $\gamma$      | 1.36         | 1.36        | 1.28                   |
|         | H $\delta$      | 1.56         | 1.55        | 1.34                   |
|         | H $\epsilon$    | 2.79         | 2.79        | 2.96                   |
| Arg9    | HN              | 7.89         | 7.93        | 8.37                   |

|                 |               |      |      |      |
|-----------------|---------------|------|------|------|
| Lys10           | H $\alpha$    | 4.28 | 4.28 | 4.19 |
|                 | H $\beta$     | 1.71 | 1.70 | 1.75 |
|                 | H $\gamma$    | 1.52 | 1.53 | 1.58 |
|                 | H $\delta$    | 3.12 | 3.12 | 3.16 |
|                 | NH $\epsilon$ | -    | 7.53 | -    |
|                 | HN            | 7.89 | 7.90 | 8.49 |
|                 | H $\alpha$    | 4.22 | 4.21 | 4.24 |
|                 | H $\beta$     | 1.54 | 1.52 | 1.67 |
|                 | H $\gamma$    | 1.28 | 1.52 | 1.28 |
|                 | H $\delta$    | 1.54 | 1.27 | 1.34 |
| Phe11           | H $\epsilon$  | 2.76 | 2.76 | 2.96 |
|                 | HN            | 7.96 | 7.98 | 8.51 |
|                 | H $\alpha$    | 4.51 | 4.50 | 4.60 |
|                 | H $\beta$ 1   | 3.05 | 3.06 | 3.04 |
|                 | H $\beta$ 2   | 2.85 | 2.86 | 3.04 |
| His12           | Harom         | 7.04 | 7.07 | 7.30 |
|                 | HN            | 8.03 | 8.05 | 8.35 |
|                 | H $\alpha$    | 4.43 | 4.44 | 4.49 |
|                 | H $\beta$ 1   | 2.90 | 2.94 | 3.08 |
|                 | H $\beta$ 2   | 2.90 | 2.87 | 2.97 |
| NH <sub>2</sub> | H $\delta$    | 6.83 | 6.83 | 6.96 |
|                 | H $\epsilon$  | 7.57 | 7.58 | 7.77 |
|                 | HN1           | 7.1  | 7.12 | 7.14 |
|                 | HN2           | 6.99 | 7.00 | 7.05 |

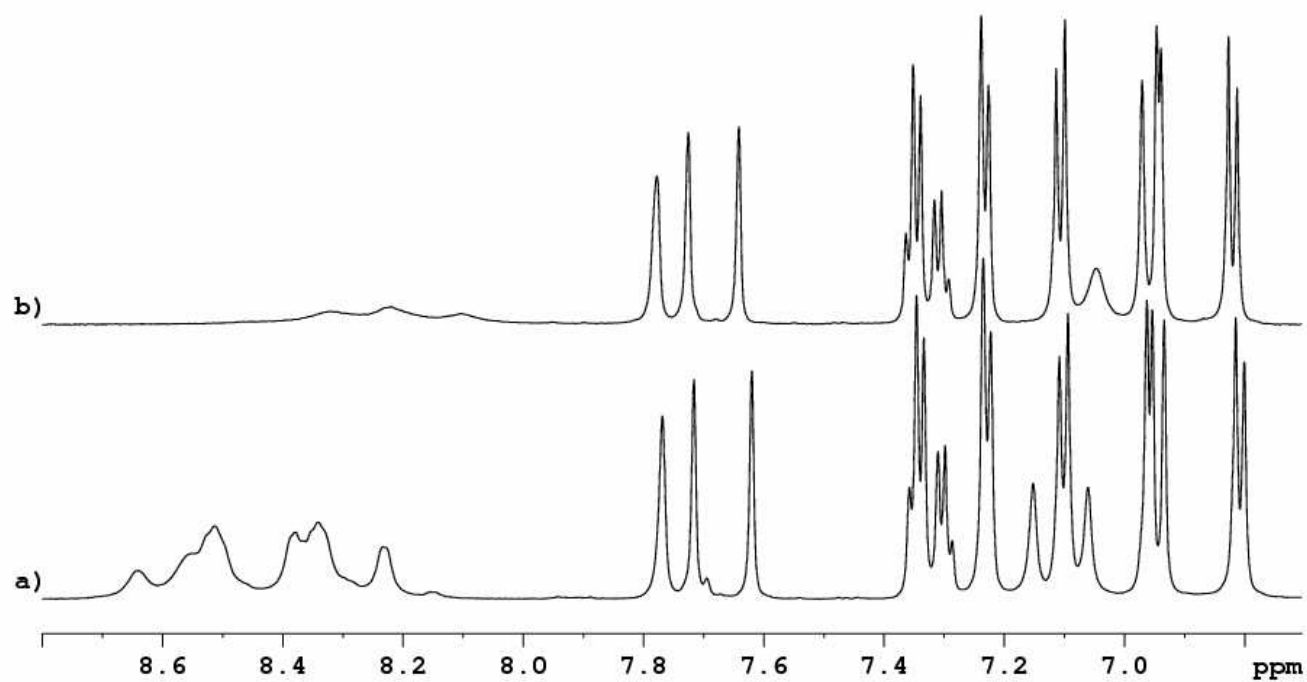

**Figure 1S.** <sup>1</sup>H 1D spectra of P-113 1.0 mM, pH 7.0, in H<sub>2</sub>O/D<sub>2</sub>O 9:1 mixture at (a) T= 278 and (b) T=298 K.

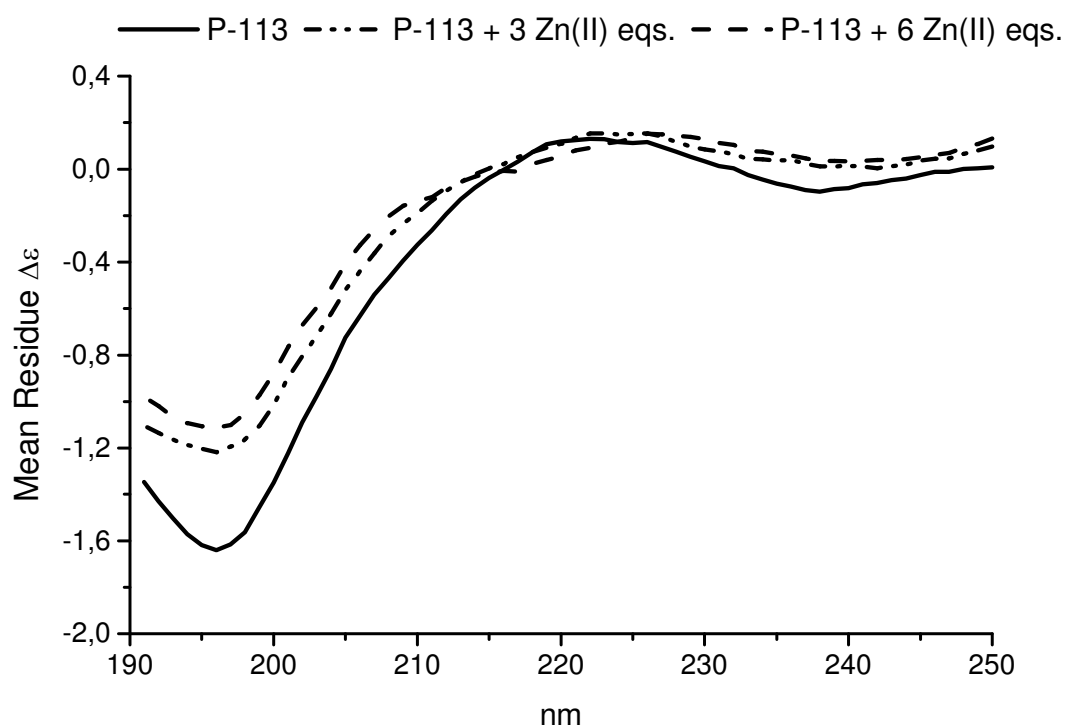

**Figure 2S.** CD spectra of P-113 in absence (solid line) and in presence of 3.0 (dot-dash line) or 6.0 (dash line) Zn(II) eqs. All the samples were 0.06 mM, in water, pH 7.0, T=318.

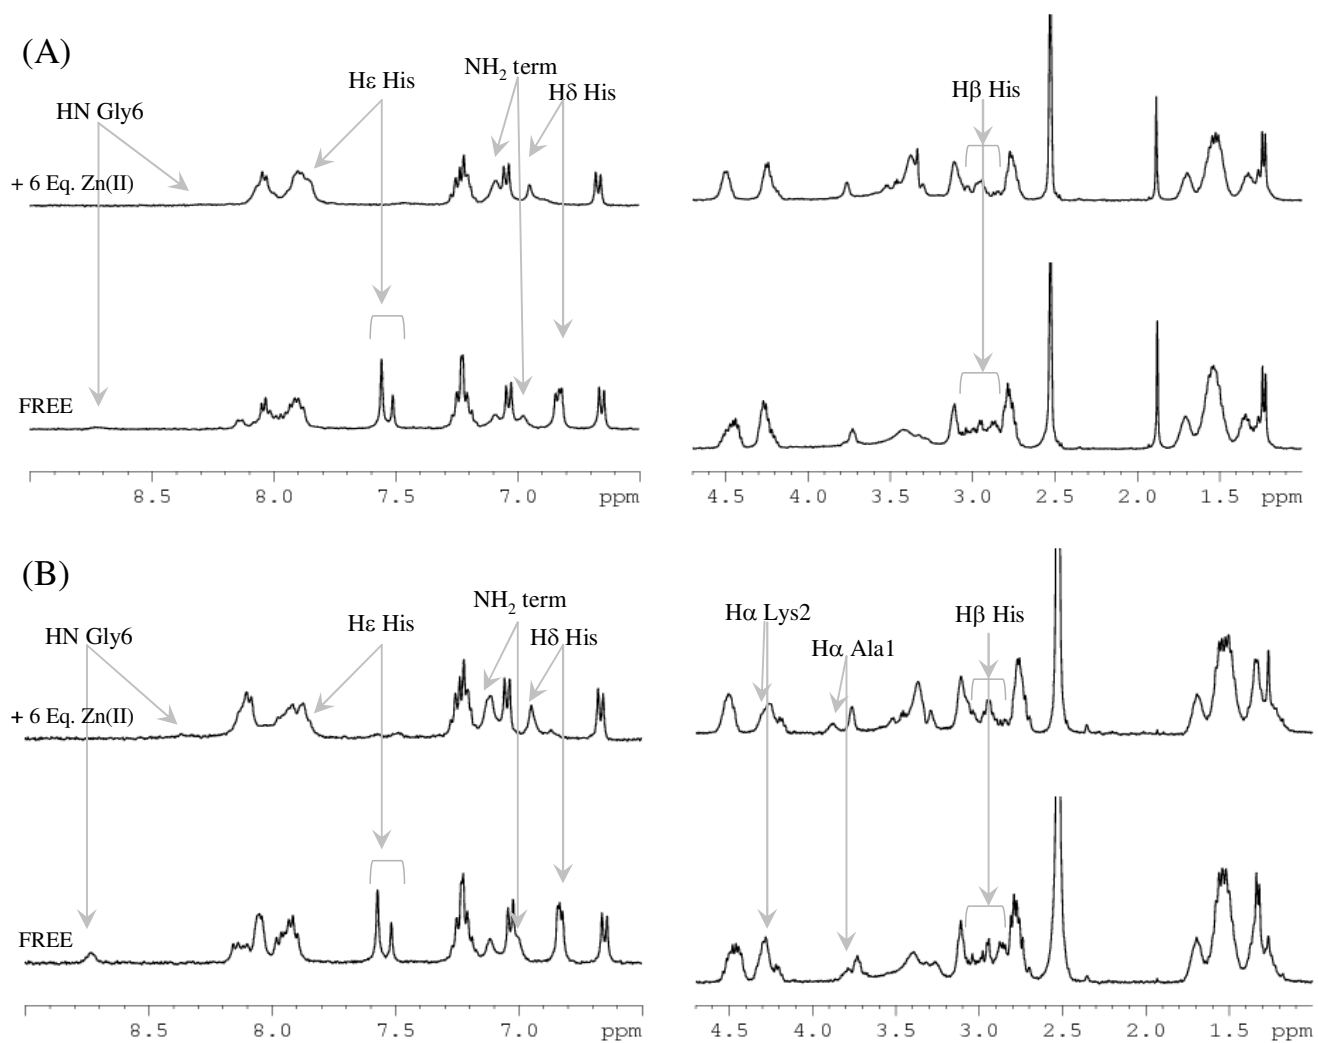

**Figure 3S.** Selected regions of  $^1\text{H}$  1D NMR spectra at  $T=318\text{ K}$  of (A) Ac-P113, (B) P-113. The peptide solutions were  $2.0\text{ mM}$ , in  $\text{DMSO-}d_6$ .

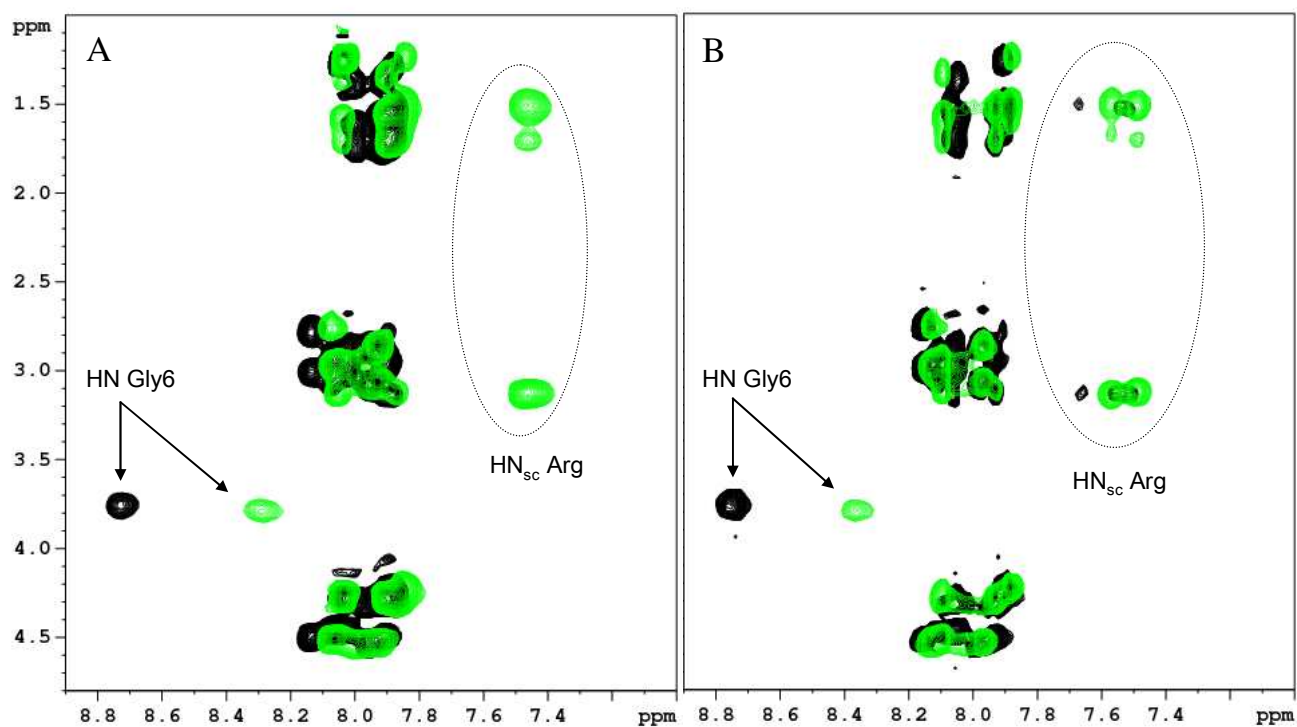

**Figure 4S.** Selected regions of  $^1\text{H}$ - $^1\text{H}$  TOCSY spectra in absence (black) and in presence (green) of 6.0  $\text{Zn(II)}$  eqs. (A) Ac-P113, (B) P-113. The peptide solutions were 2.0 mM, in  $\text{DMSO-d}_6$ .



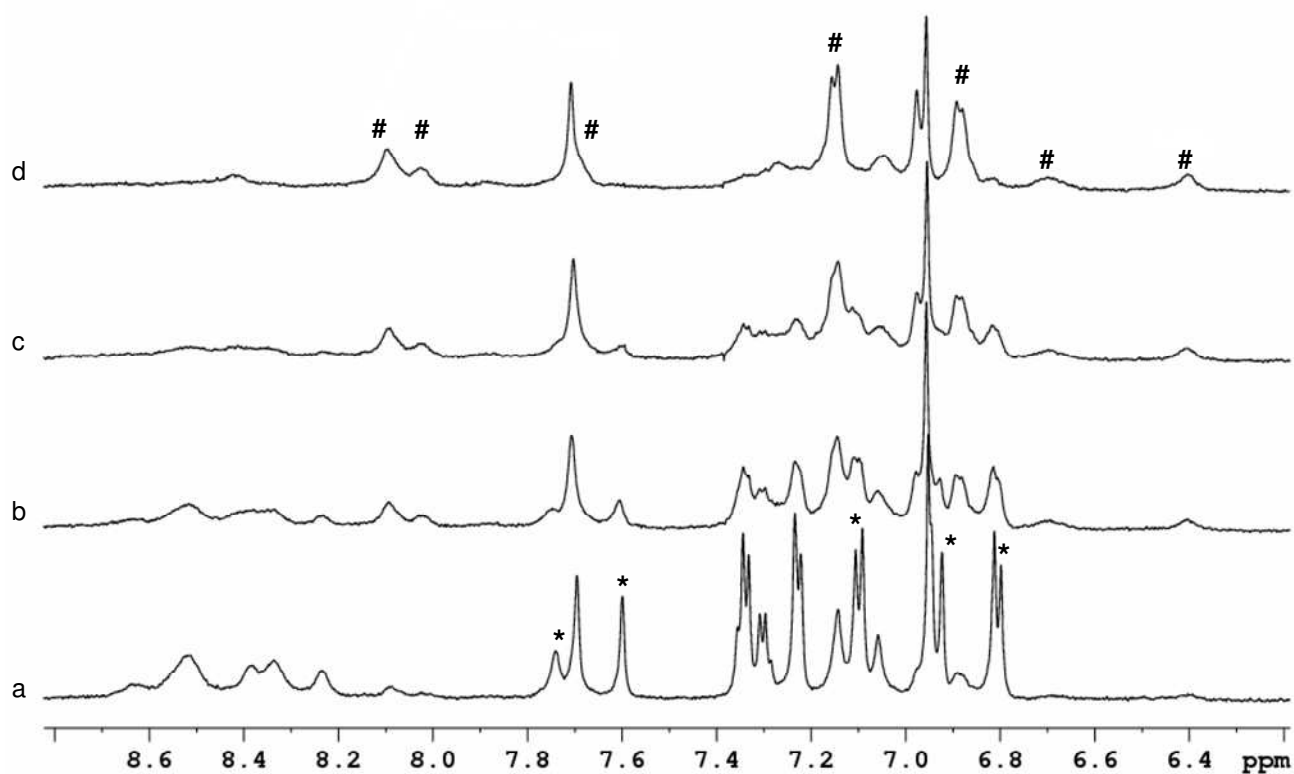

**Figure 5S.** Selected region of  $^1\text{H}$  1D NMR spectra at  $T=278\text{ K}$  of P113 in presence of a) 0.25 Zn(II) eqs.; b) 0.50 Zn(II) eqs.; c) 1.0 Zn(II) eqs.; d) 2.0 Zn(II) eqs. The peptide solutions were 1.0 mM, in  $\text{H}_2\text{O}/\text{D}_2\text{O}$  (9:1). \* and # labels correspond to the signals of the apo and Zn(II) bound forms respectively.

**A**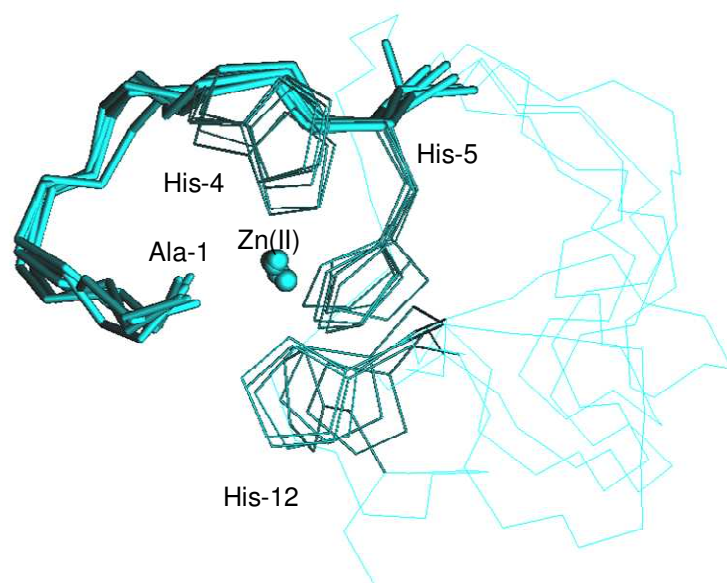**B**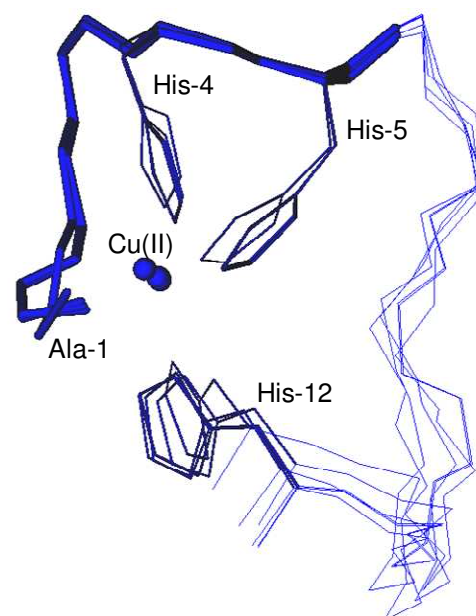

**Figure 6S.** Comparison of the (A) P113-Zn(II) and (B) P113-Cu(II) structures. In both cases the first 11 structures, fitted on the backbone of residues 1-5, are shown. Figure was created with MOLMOL 2K.1.0.
